# Supplementary material
Source: PubMed Central journal article supplement (PMC5105902)
Supplement: JB.00592-16_zjb999094248so1.pdf [file JB.00592-16_zjb999094248so1.pdf]

## 1 **Supplementary Figure Legends**

2 Supplementary Figure S1. Maps of single *cos* (pYUB1551) and double *cos* (pYUB1552)  
3 vectors expressing mVenus from the p<sub>left</sub> promoter of phage L5. Plasmid pYUB1551 is  
4 the name allocated to the sequenced plasmid pYUB1391(6). Unique restriction sites are  
5 indicated except for the *PacI* recognition sequence, which is unique in pYUB1551 but  
6 appears twice in pYUB1552.

7  
8 Supplementary Figure S2. Construction of the DS6A shuttle phasmid. The indicated  
9 DNA samples were evaluated by electrophoresis on agarose gels. (A) High quality  
10 genomic DNA isolated from DS6A. (i) Genomic DNA isolated from D29 phage amplified  
11 on *M. smegmatis* using the standard phage amplification protocol. (ii) Genomic DNA  
12 isolated from DS6A phage amplified on *Mtb* using the standard phage amplification  
13 protocol. (iii) Genomic DNA isolated from DS6A phage amplified with the modified  
14 amplification protocol resulting in high quality phage DNA suitable for shuttle phasmid  
15 construction. (B) Restriction digestion confirming shuttle phasmids from DS6A phage. A  
16 DS6A deletion library was electroporated into *Mtb*. Genomic DNA from the recombinant  
17 phages obtained was isolated, and the presence of plasmid was confirmed by *PacI*  
18 digestion. A band of the correct size for pYUB328 plasmid (~3.9 kb) was released from  
19 seven of the eight DS6A recombinant phages (indicated by the lower arrow).

20  
21 Supplementary Figure S3. Phylogenetic trees of selected DS6A proteins analyzed  
22 against the mycobacteriophage database. Phylogenetic trees of DS6A structural  
23 proteins (i) capsid, (ii) major tail subunit, (iii) tape measure protein, functional proteins  
24 (iv) Lysin A and (v) Lysin B, and DNA modifying proteins (vi) DNA polymerase III, (vii)

25 integrase, (viii) MazG, and (ix) Primase were assembled via maximum parsimony  
26 analysis. The colored shape next to the phage name indicates its cluster assignment.  
27  
28

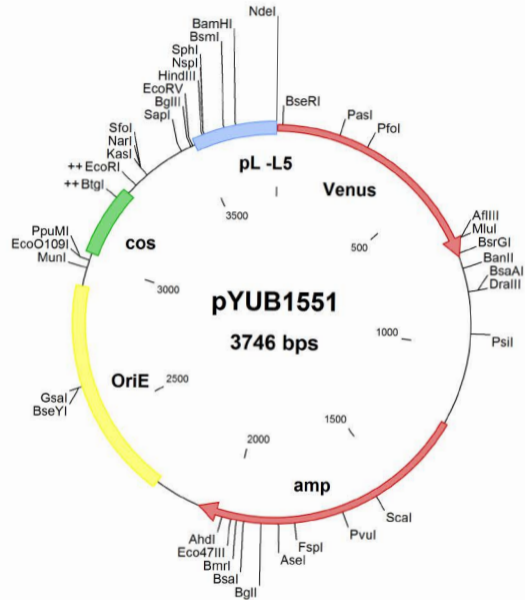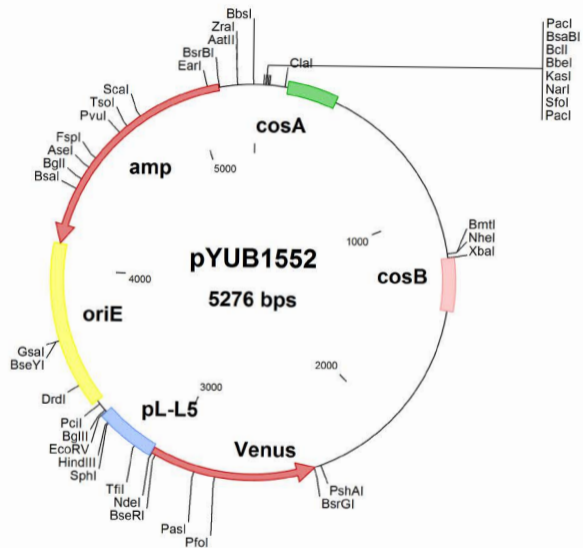

**Fig. S1**

**A**

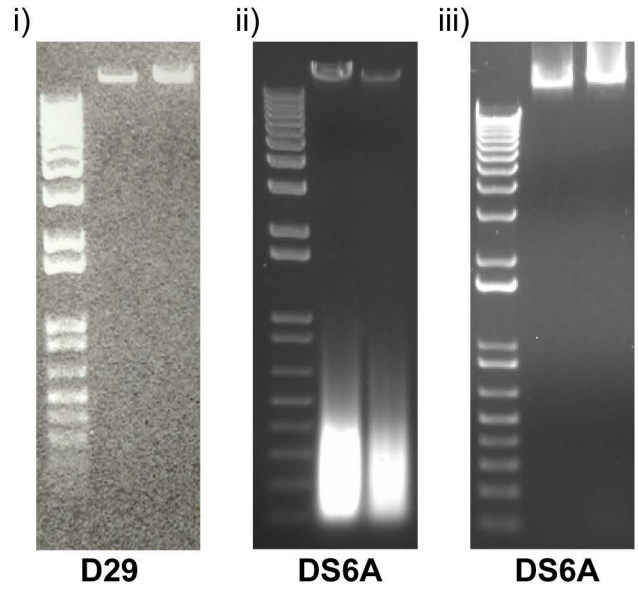

**B**

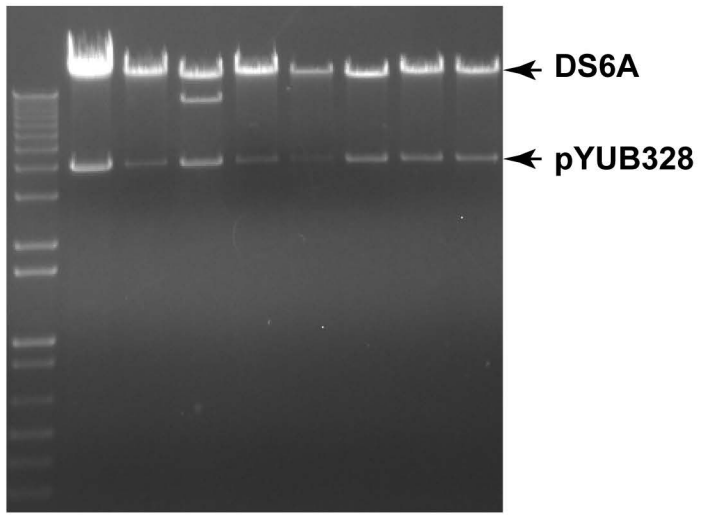

**Fig. S2**

## Cluster assignment legend

|   |            |   |            |   |              |
|---|------------|---|------------|---|--------------|
| ● | Cluster A  | ■ | Cluster CU | ▲ | Cluster R    |
| ● | Cluster AK | ■ | Cluster CV | ▲ | Cluster S    |
| ● | Cluster AR | ■ | Cluster DB | ▲ | Cluster T    |
| ● | Cluster AS | ■ | Cluster DE | ▲ | Cluster V    |
| ● | Cluster B  | ◆ | Cluster F  | ▲ | Cluster W    |
| ● | Cluster BE | ◆ | Cluster G  | ▲ | Cluster X    |
| ● | Cluster BH | ◆ | Cluster H  | ▲ | Cluster Y    |
| ● | Cluster BU | ◆ | Cluster I  | ■ | Singleton    |
| ● | Cluster BV | ◆ | Cluster J  | ▲ | Unclassified |
| ● | Cluster BW | ◆ | Cluster K  | ▲ | DS6A         |
| ■ | Cluster C  | ◆ | Cluster L  |   |              |
| ■ | Cluster CB | ◆ | Cluster M  |   |              |
| ■ | Cluster CC | ◆ | Cluster N  |   |              |
| ■ | Cluster CQ | ▲ | Cluster O  |   |              |
| ■ | Cluster CR | ▲ | Cluster Q  |   |              |
| ■ | Cluster CT | ▲ |            |   |              |

Fig. S3



ii)

gp16  
Major tail subunit

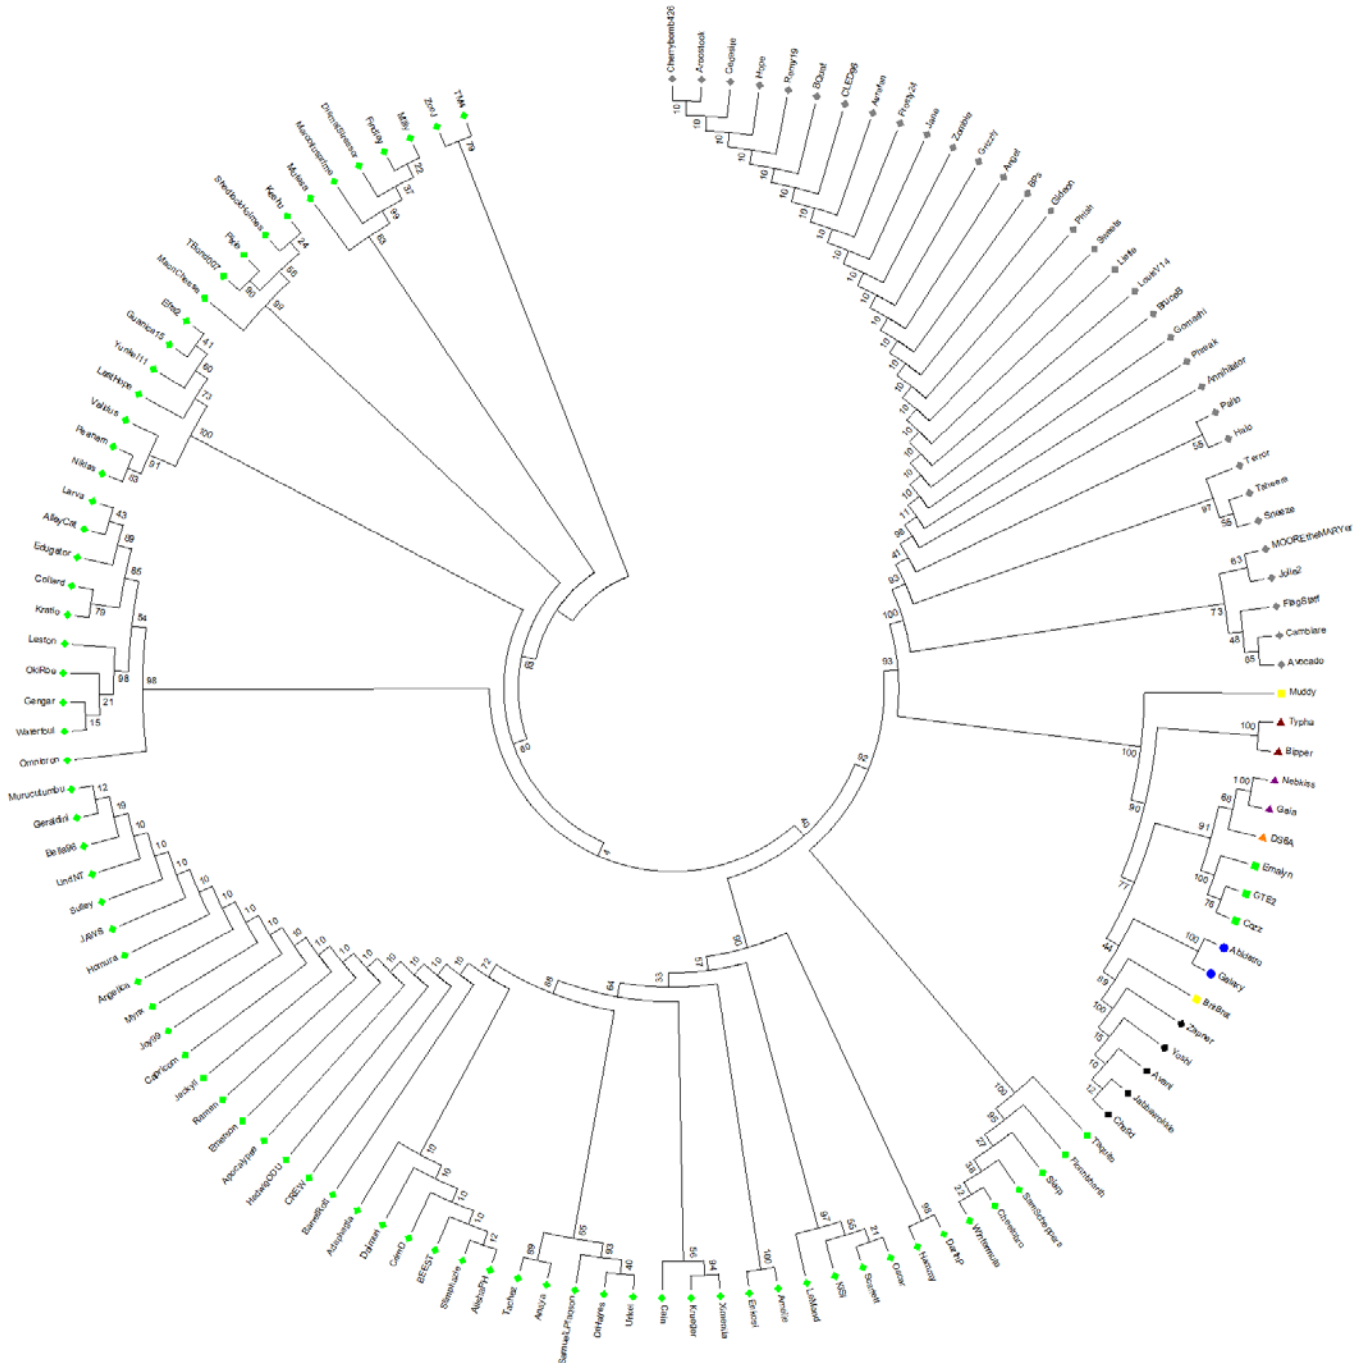

Fig. S3

iii)

gp19

Tape measure protein

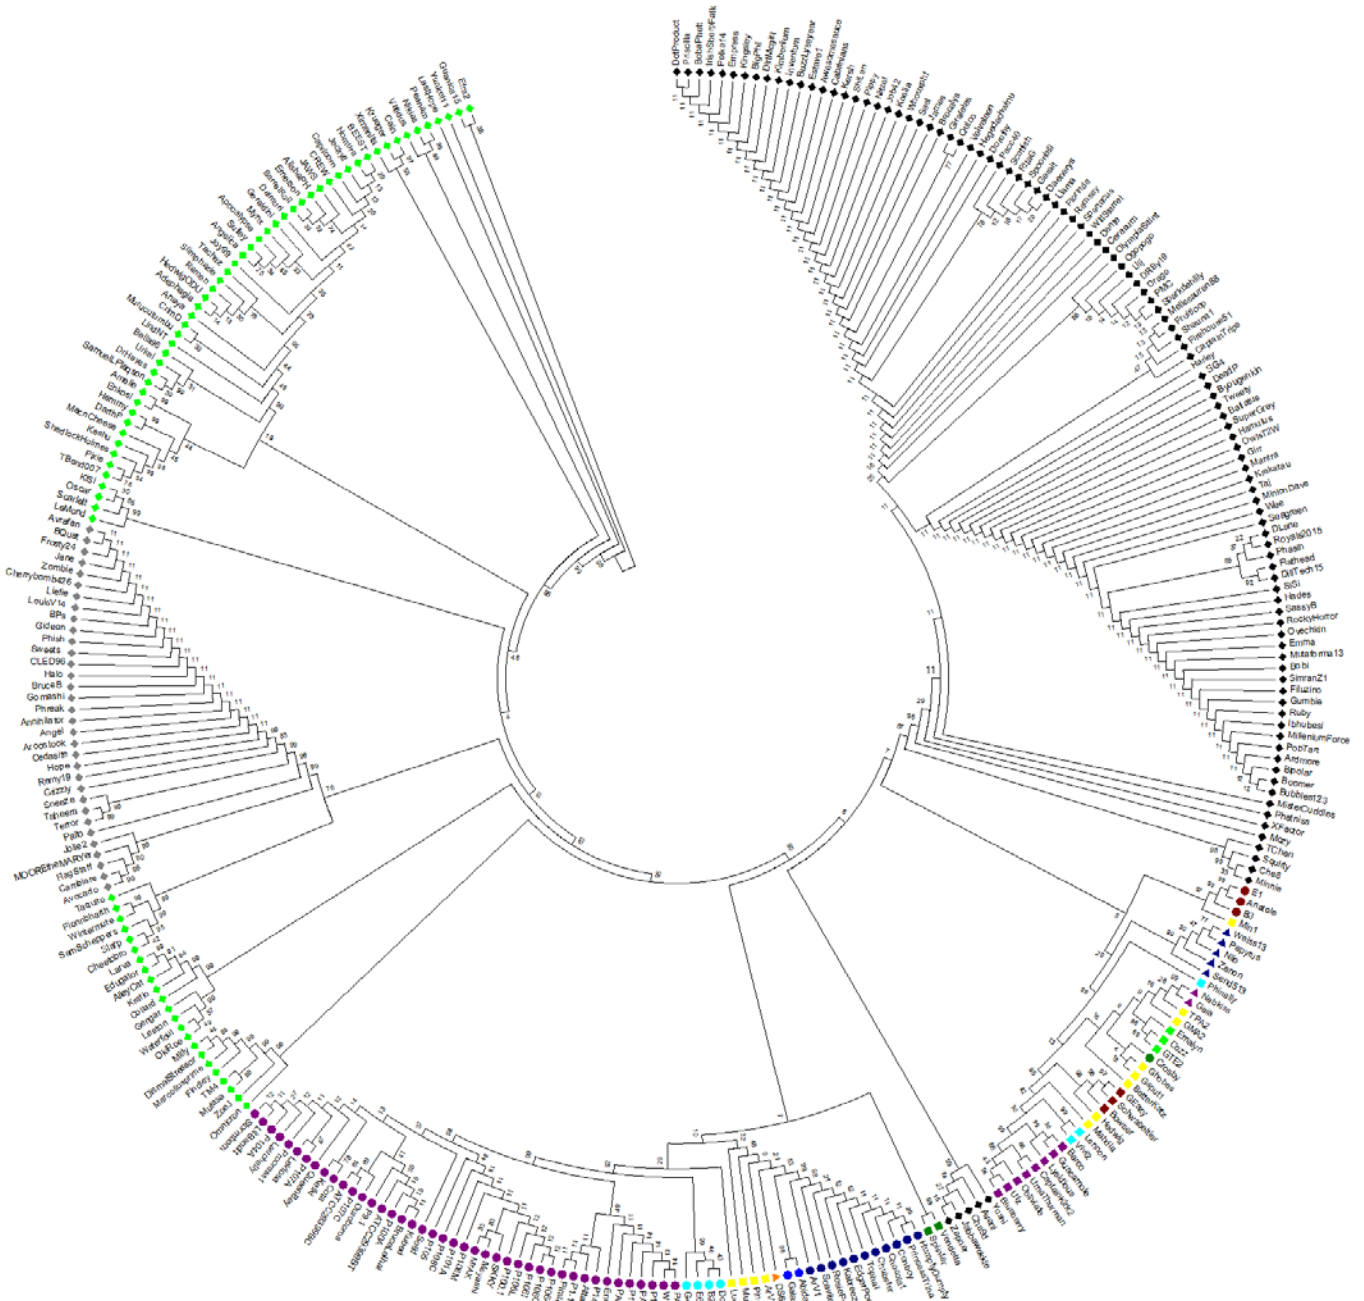

Fig. S3



iv)

gp30  
Lysin A

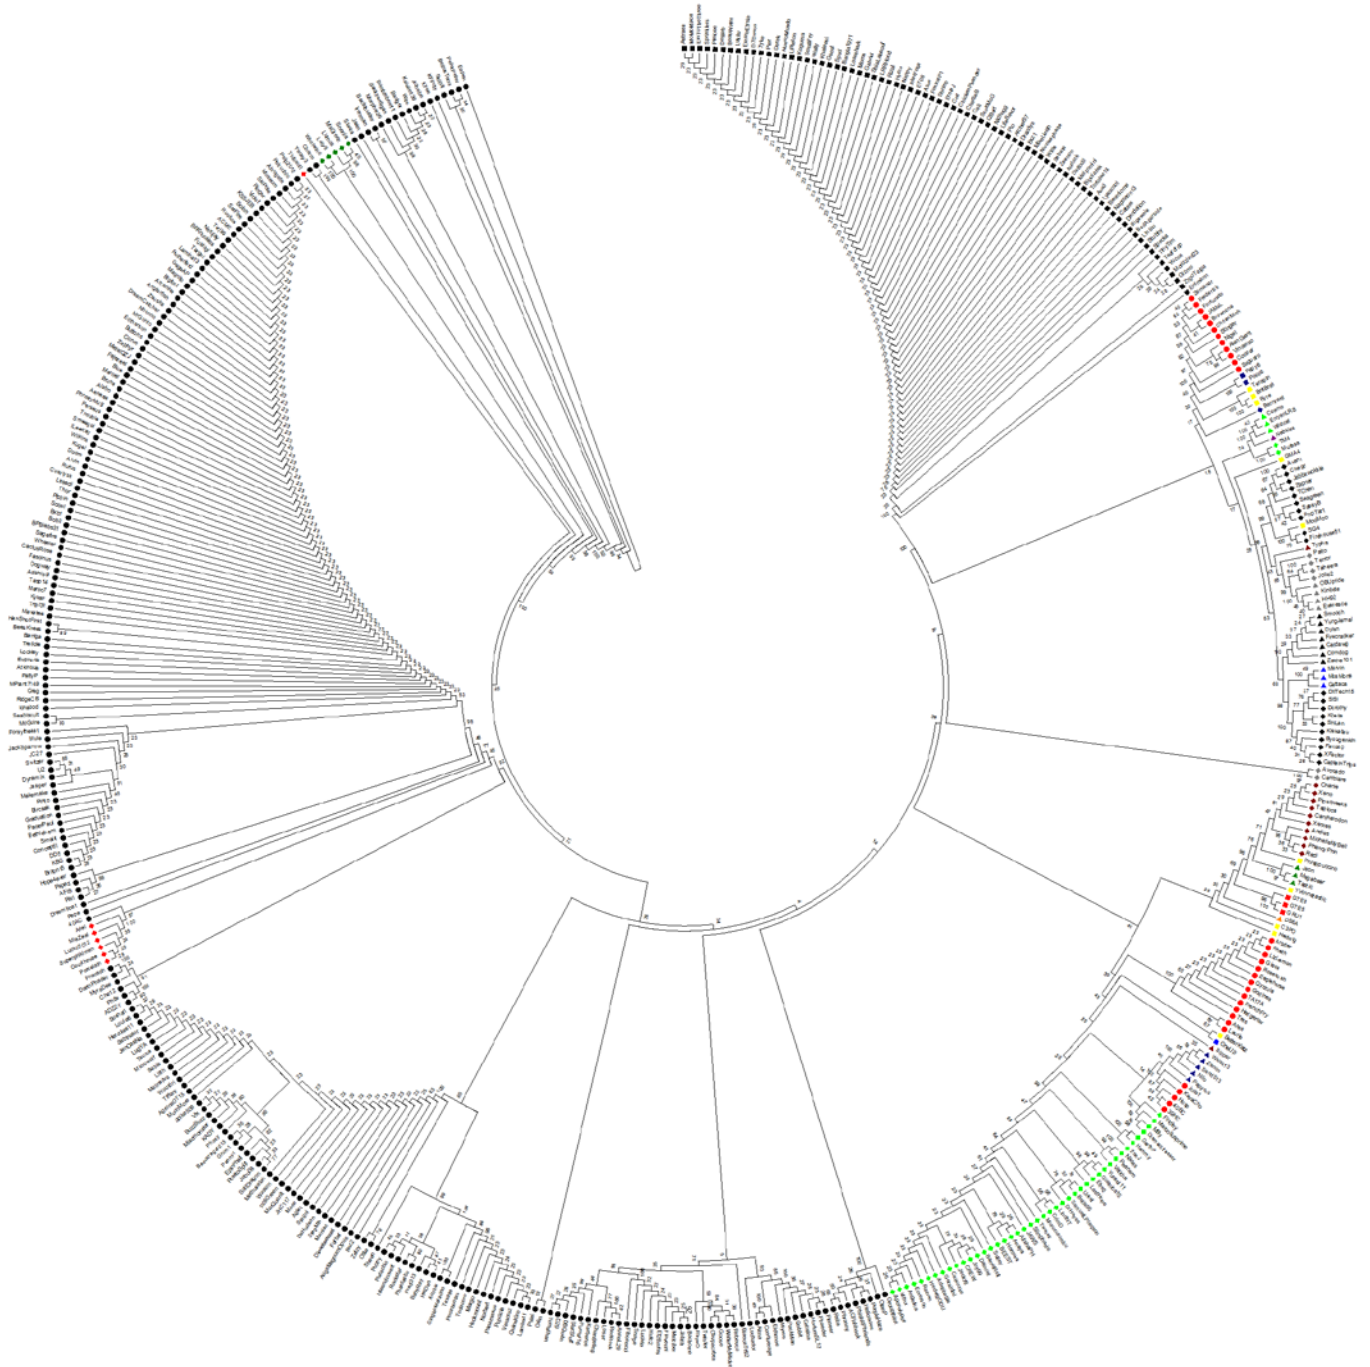

Fig. S3

v)

gp31  
Lysin B

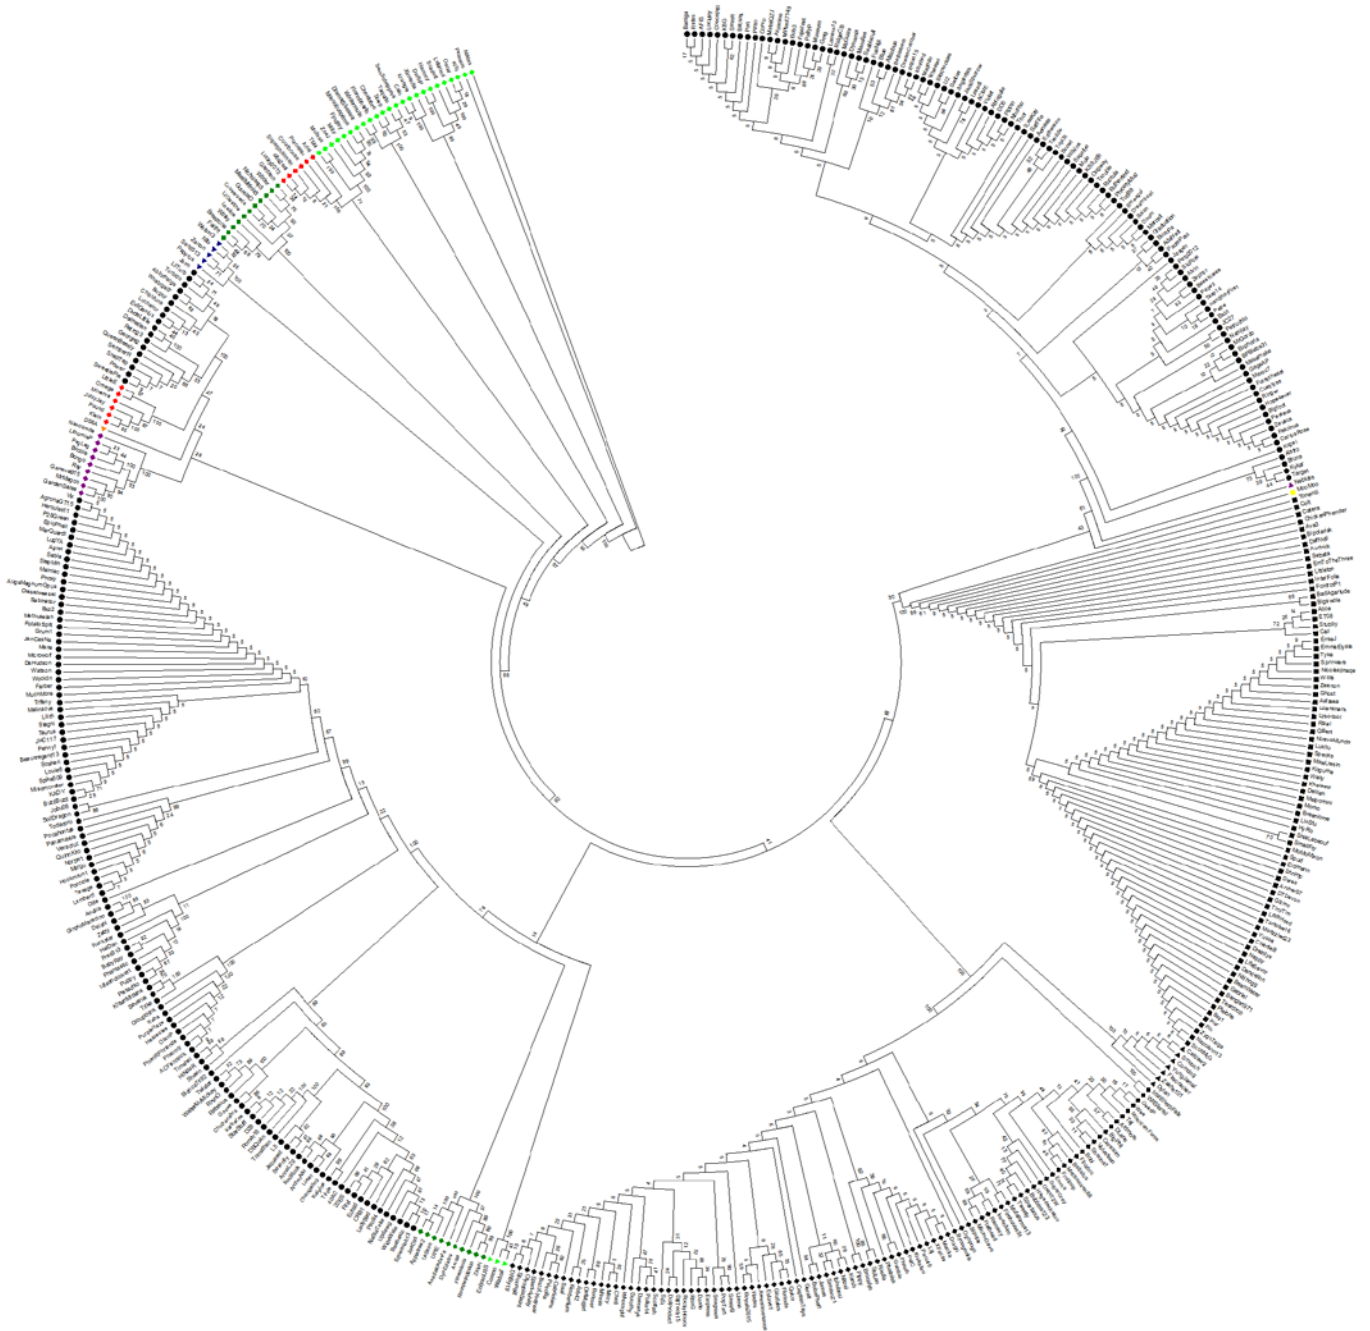

Fig. S3

vi)

# gp34 DNA polymerase III

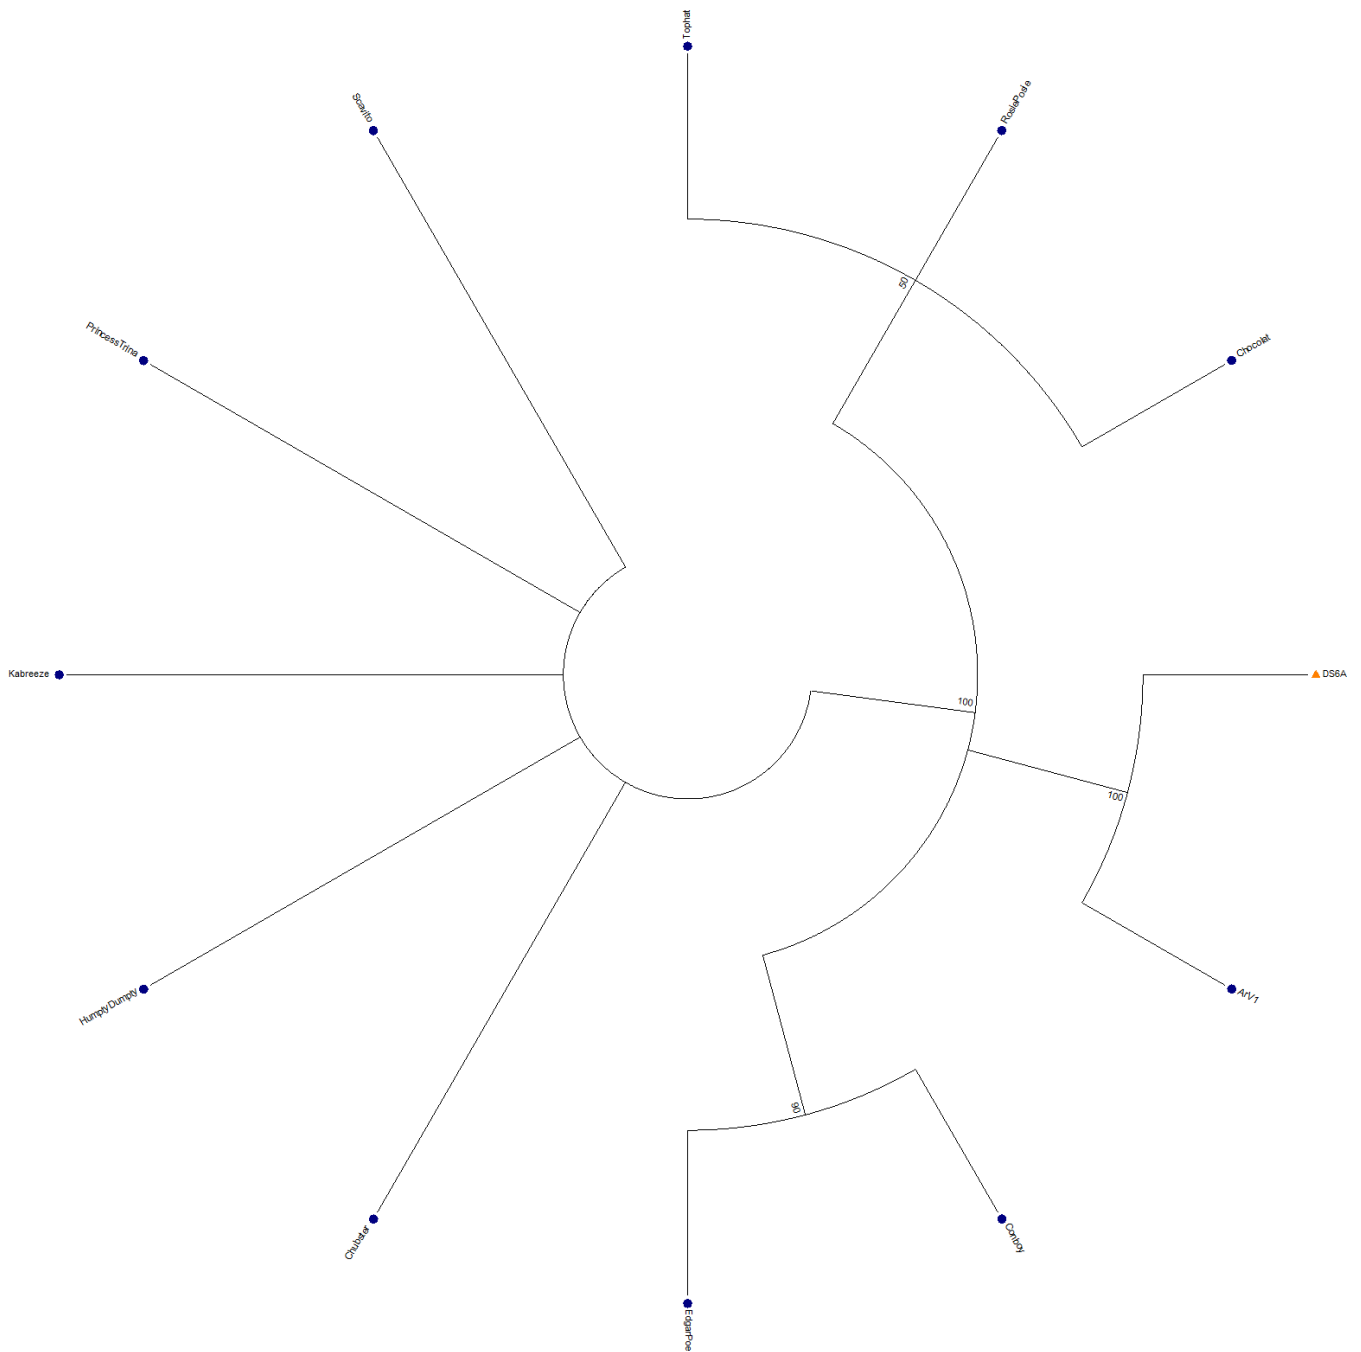

Fig. S3

vii)

# gp56 Integrase

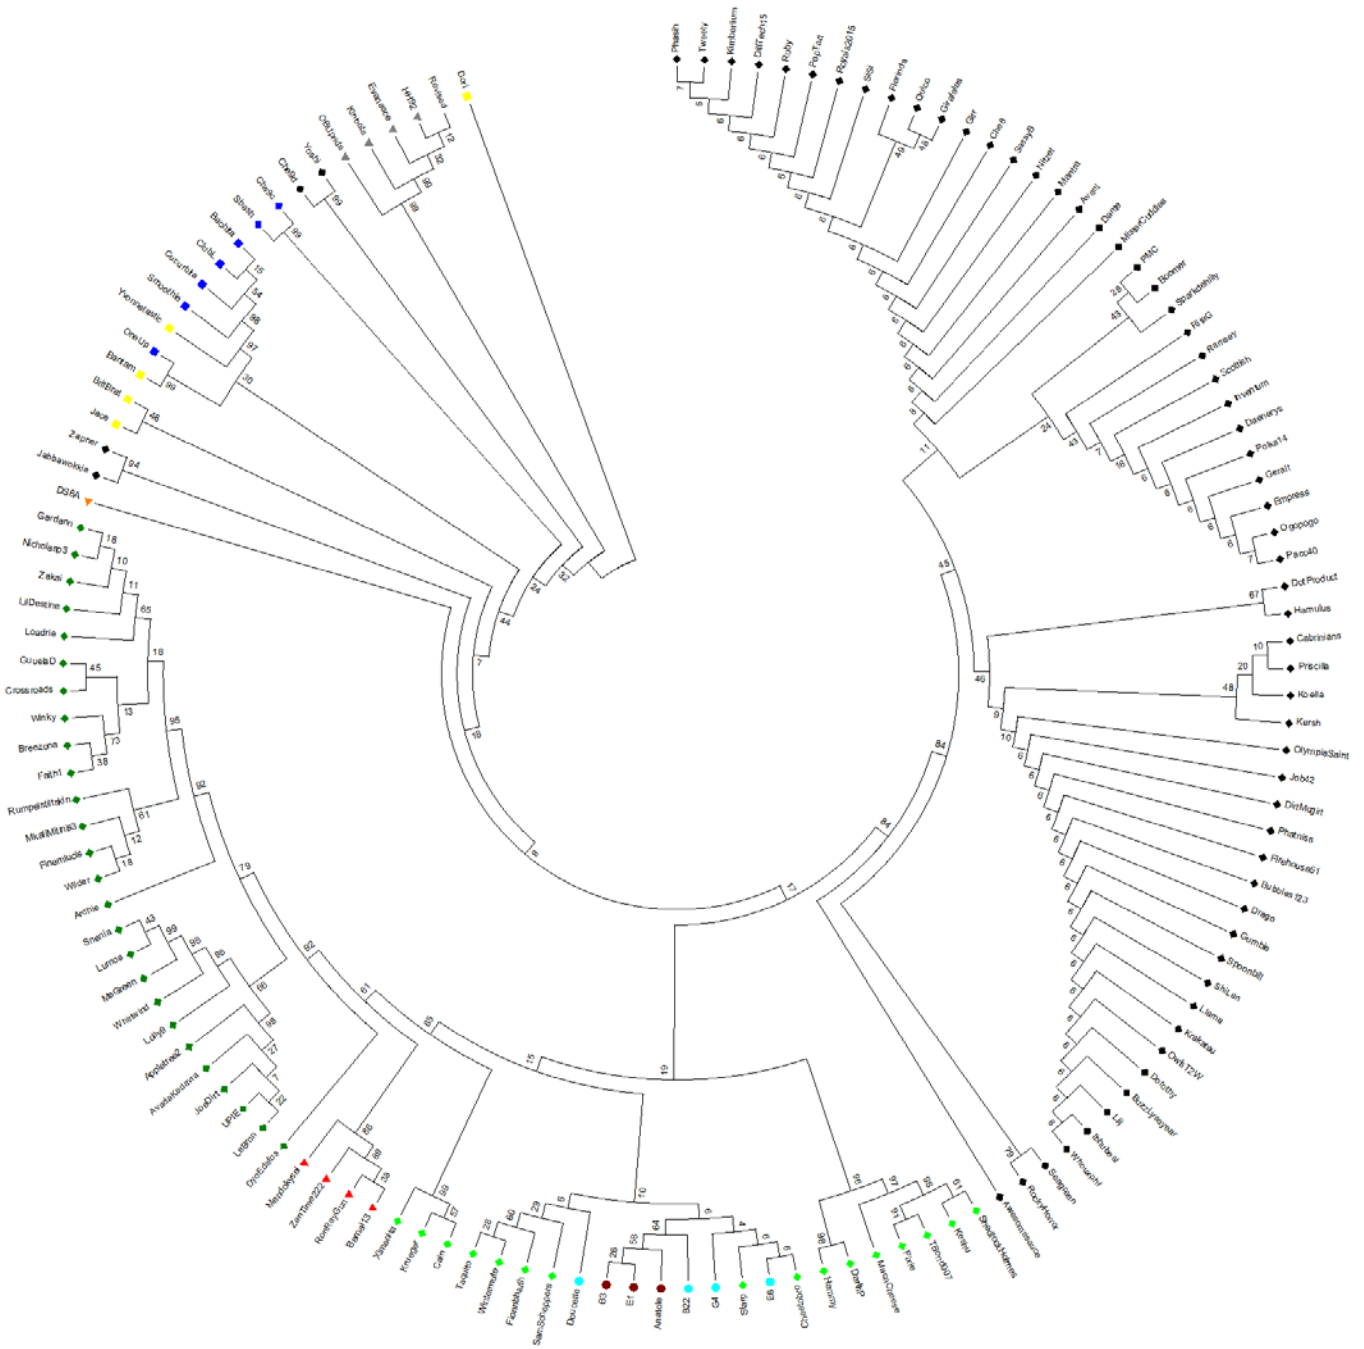

Fig. S3

viii)

gp70  
MazG

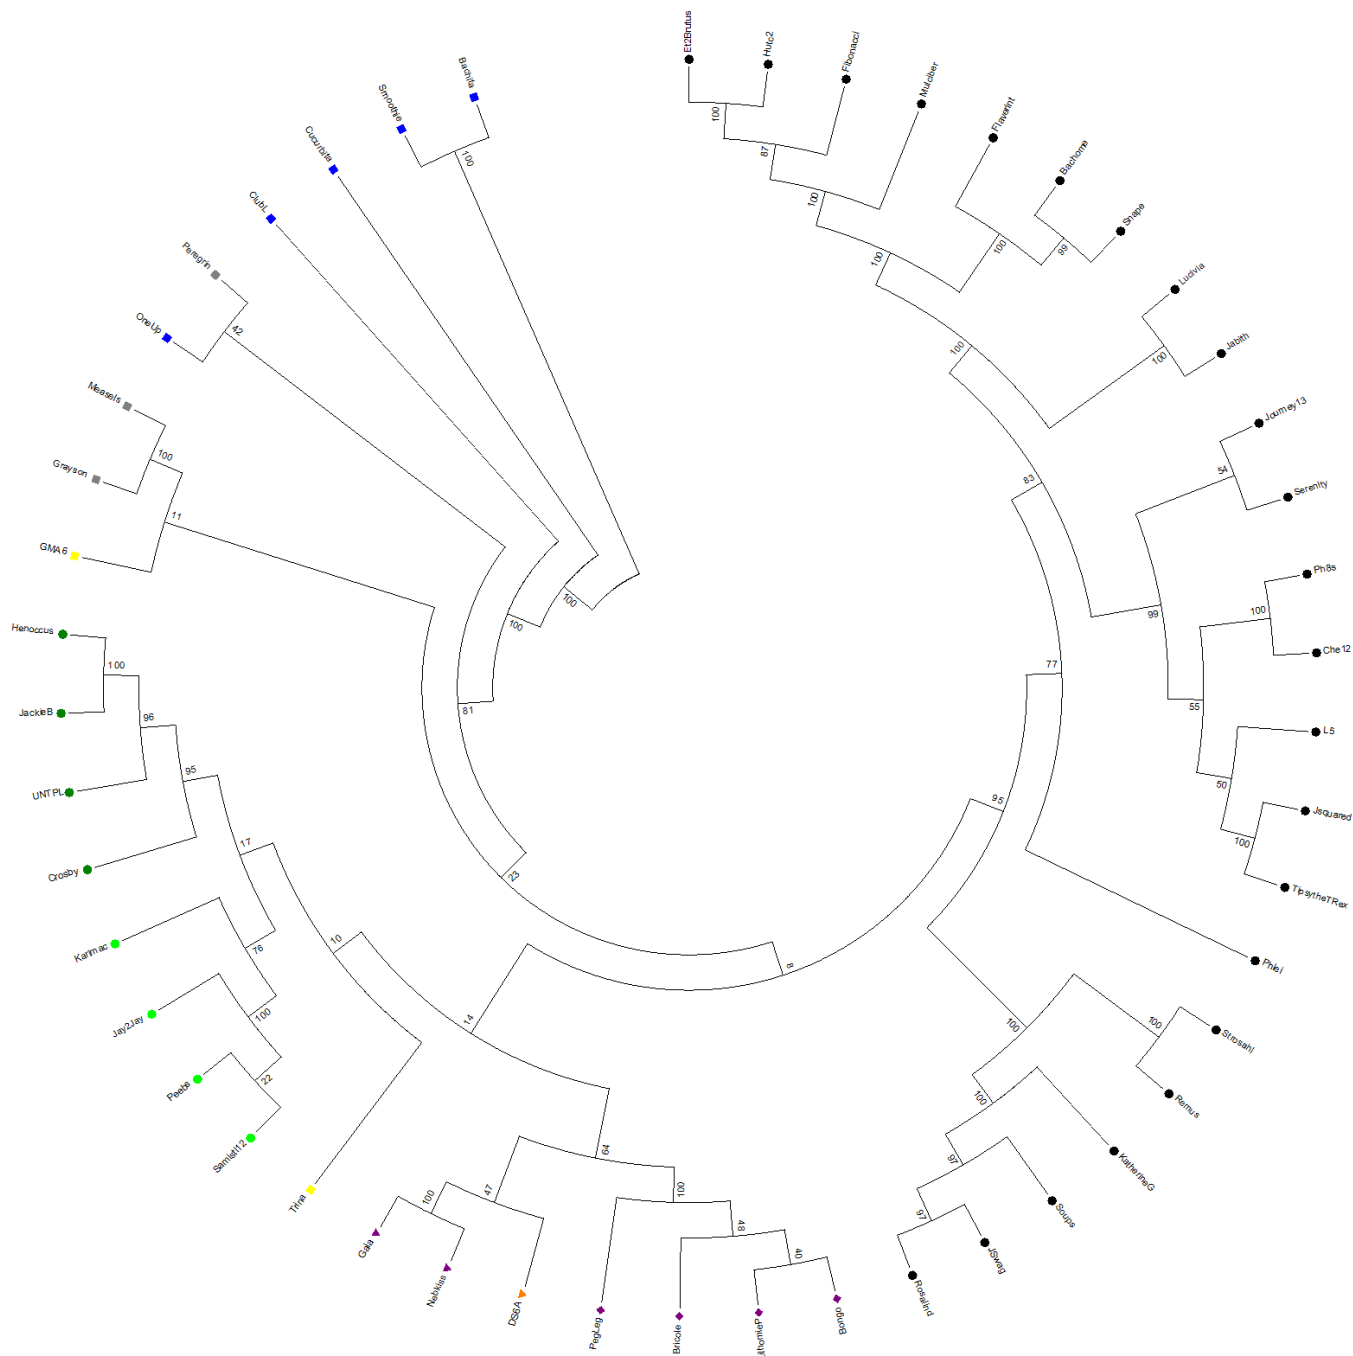

Fig. S3

ix)

gp77  
Primase

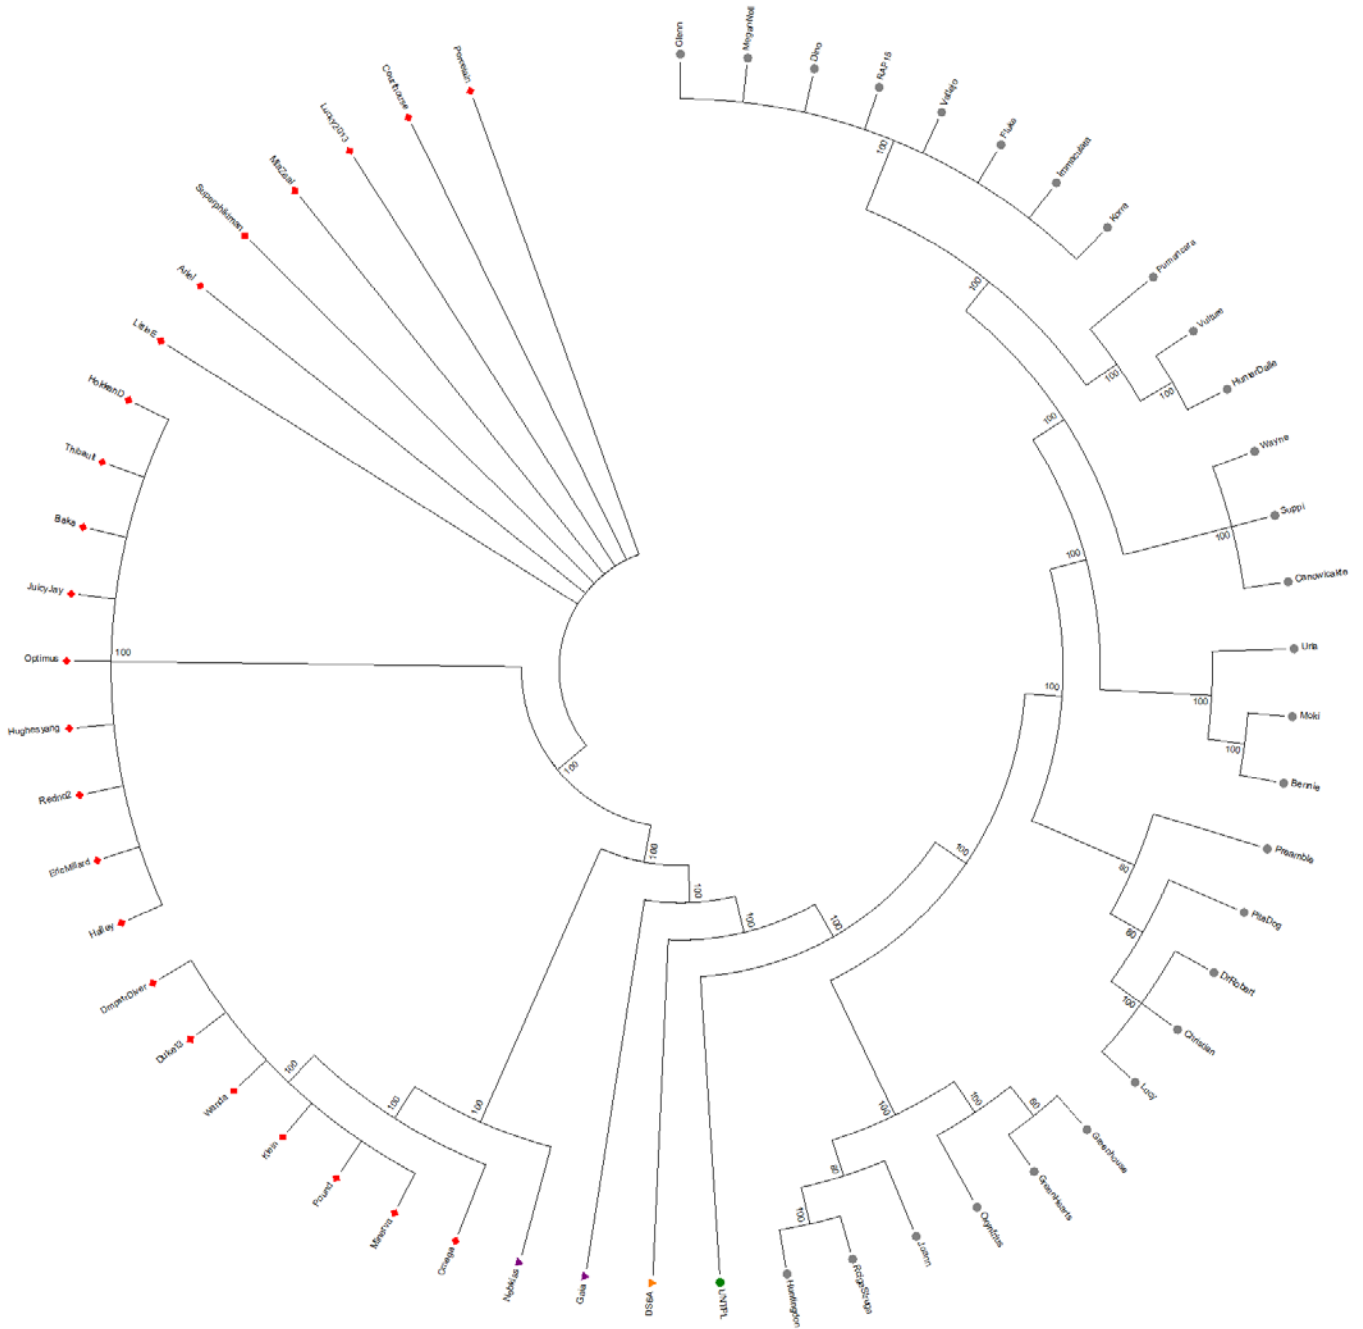

Fig. S3
